# Supplementary material for: Cancer, cancer treatment and aneurysmatic ascending aorta growth within a retrospective single center study
Source: Atypon-hosted journal article supplement (doi:10.1024/0301-1526/a001038), 2022-11-14
Supplement: 0301-1526_a001038_esm1.pdf [file 0301-1526_a001038_esm1.pdf]

## Electronic supplementary material

### ESM 1. Summary and specific types of cancer

| <b>cancer summary</b> | <b>specific cancer types</b>                                                                                                                                                                                                                                     |
|-----------------------|------------------------------------------------------------------------------------------------------------------------------------------------------------------------------------------------------------------------------------------------------------------|
| Prostate              | prostate adenocarcinoma                                                                                                                                                                                                                                          |
| Lung                  | adenocarcinoma and squamous cell carcinoma from non-small cell lung cancer (NSCLC), small cell lung cancer (SCLC)                                                                                                                                                |
| Esophagus             | esophageal carcinoma, adenocarcinoma of the esophago-gastric junction                                                                                                                                                                                            |
| Hematologic/Lymphoma  | diffuse large B-cell lymphoma (DLBCL), follicular lymphoma, burkitt-lymphoma, anaplastic large cell lymphoma (ALCL), acute lymphoblastic leukemia (ALL), chronic lymphatic leukemia (CLL), multiple myeloma (MM), T-cell-lymphomas (T-NHL), mantle cell lymphoma |
| Colorectal            | colon carcinoma, neuroendocrine tumor                                                                                                                                                                                                                            |
| stomach               | adenocarcinoma (intestinal, diffuse), adenocarcinoma of the esophago-gastric junction, gastrointestinal stromal tumor                                                                                                                                            |
| Skin cancer           | melanoma                                                                                                                                                                                                                                                         |
| Head and neck         | Larynx carcinoma, laryngo-/ oro-/ nasopharyngeal cancer, epiglottis carcinoma, tonsil cancer, oral squamous cell carcinoma                                                                                                                                       |
| Urinary tract         | bladder cancer, ureteral cancer                                                                                                                                                                                                                                  |
| Pancreas              | ductal adenocarcinoma, neuroendocrine tumor                                                                                                                                                                                                                      |
| Breast                | triple positive and triple negative breast cancer; lobular and ductal invasive breast cancer                                                                                                                                                                     |
| Kidney                | renal cell carcinoma                                                                                                                                                                                                                                             |
| Sarcoma               | synovial sarcoma, pleomorphic liposarcoma, dedifferentiated sarcoma, angiosarcoma                                                                                                                                                                                |
| Other                 | cholangiocarcinoma, thyroid gland cancer, Merkel-cell cancer, penile cancer, vulvar cancer, meningioma, cancer of unknown primary (CUP), seminoma, hepatocellular carcinoma, endometrial carcinoma, ovarian cancer                                               |
