# Supplementary material for: Cancer, cancer treatment and aneurysmatic ascending aorta growth within a retrospective single center study
Source: Atypon-hosted journal article supplement (doi:10.1024/0301-1526/a001038), 2022-11-14
Supplement: 0301-1526_a001038_esm2.pdf [file 0301-1526_a001038_esm2.pdf]

## Electronic supplementary material

### ESM 2. Summary and specific types of chemotherapy

| <b>chemotherapy summary</b>        | <b>specific chemotherapy substances</b>                                                                                                      |
|------------------------------------|----------------------------------------------------------------------------------------------------------------------------------------------|
| Alkylating agents                  | Cisplatin, Carboplatin, Oxaliplatin, Temozolomid, Cyclophosphamide, Melphalan, Bleomycin, Chlorambucil, Estramustin, Mitomycin, Trabectedine |
| Antimetabolites                    | Pemetrexed, 6-Mercaptopurin, Cytarabine, Gemcitabine, Capecitabine                                                                           |
| Mitotic inhibitors/Plant alkaloids | Vincristine, Vinorelbine, Docetaxel, Paclitaxel, Cabazitaxel                                                                                 |
| Antiandrogens                      | Bicalutamide, Leuprorelinacetat, Abiraterone                                                                                                 |
| GnRH-Agonist                       | Goserelin                                                                                                                                    |
| Corticosteroids                    | Prednisolone, Dexamethasone                                                                                                                  |
| Monoclonal antibodies              | Rituximab, Obinutuzumab, PSMA-Lutetium-Ligand, Brentuximab, Daratumumab, Trastuzumab, Catumaxomab, Tafasitamab, Pertuzumab                   |
| Topoisomerase inhibitors           | Irinotecan, Etoposid, Topotecan                                                                                                              |
| Anthracyclines                     | Daunorubicin, Doxorubicin, Caelyx Epirubicin                                                                                                 |
| Kinase/proteasome inhibitors       | Imatinib, Masitinib, Cabozantinib, Palbociclib, Sorafenib, Erlotinib, Sunitinib, Nintedanib, Cetuximab, Tarceva, Bortezomib                  |
| VEGF inhibitors                    | Bevacizumab, Ramucirumab, Aflibercept                                                                                                        |
| Immune checkpoint therapy          | Nivolumab, Ipilimumab, Pembrolizumab, Atezolizumab                                                                                           |
| PSMA ligands                       | PSMA-Lutetium-177-Ligand, PSMA-Actinium-225-Ligand                                                                                           |
| Immune modulating agents (IMiDs)   | Lenalidomid, Interferon                                                                                                                      |
| Antifolates                        | Methotrexate                                                                                                                                 |
| Aromatase inhibitors               | Letrozol, Exemestan                                                                                                                          |
| Others                             | Biphosphonates, Faslodex, Lipidol, Embocept, Mistletoe therapy, Asperaginase, Denosumab                                                      |
