# Supplementary material for: Cancer, cancer treatment and aneurysmatic ascending aorta growth within a retrospective single center study
Source: Atypon-hosted journal article supplement (doi:10.1024/0301-1526/a001038), 2022-11-14
Supplement: 0301-1526_a001038_esm3.pdf [file 0301-1526_a001038_esm3.pdf]

## Electronic supplementary material

**ESM 3.** Individual AscAA growth and malignancy/therapy for patients with initial ascending aortic diameter >55mm

| # | initial<br>Ø<br>(mm) | final<br>Ø<br>(mm) | Ø<br>change<br>(%) | observation<br>(months) | growth<br>rate<br>(mm/y) | age/sex<br>(y;m/f) | malignancy                                                                                                                                                                      | therapy                                                                                                                                                         |
|---|----------------------|--------------------|--------------------|-------------------------|--------------------------|--------------------|---------------------------------------------------------------------------------------------------------------------------------------------------------------------------------|-----------------------------------------------------------------------------------------------------------------------------------------------------------------|
| 1 | 60                   | 69                 | 15.0               | 33                      | 3.25                     | 65 m               | prostate carcinoma<br>pT3b pN1<br>Gleason 9                                                                                                                                     | radical<br>prostatovesiculectomy<br>with<br>lymphadenectomy<br>(op) + hormone<br>therapy + radiation<br>Leuprorelin<br>chemo + radiation<br>Rituximab.          |
| 2 | 80                   | 87                 | 8.8                | 18                      | 4.48                     | 76 w               | diffuse large<br>B-cell<br>lymphoma<br>Ann Arbor<br>IV                                                                                                                          | Cyclophosphamid.<br>Doxorubicin.<br>Vincristin.<br>Prednisolone.<br>Gemcitabine.<br>Oxaliplatin.<br>Paclitaxel. Etoposid                                        |
| 3 | 59                   | 63                 | 6.8                | 47                      | 1.02                     | 67 m               | diffuse large<br>B-cell<br>lymphoma<br>Ann Arbor<br>IIAE<br>+<br>renal clear<br>cell<br>carcinoma<br>gastric<br>cancer<br>(AEG III.<br>intestinal<br>type)<br>ypT2b ypN0<br>cM0 | nephrectomy and<br>resection of lung<br>metastasis (op) +<br>chemo + radiation<br>Rituximab.<br>Cyclophosphamid.<br>Doxorubicin.<br>Vincristin.<br>Prednisolone |
| 4 | 69                   | 71                 | 2.9                | 55                      | 0.43                     | 60 m               | colon<br>cancer<br>pT2 N0 cM0                                                                                                                                                   | chemo<br>OLF (5-FU.<br>Oxaliplatin.<br>Calciumfolinat)                                                                                                          |
| 5 | 58                   | 59                 | 1.7                | 99                      | 0.12                     | 75 f               | diffuse large<br>B-cell<br>lymphoma<br>Ann Arbor<br>IV                                                                                                                          | hemicolecotomy (op)                                                                                                                                             |
| 6 | 62                   | 61                 | 1.6                | 26                      | -0.45                    | 82 m               |                                                                                                                                                                                 | chemo<br>Rituximab.<br>Cyclophosphamid.<br>Doxorubicin.<br>Vincristin.<br>Prednisolne                                                                           |

*Notes.* The tumor stage as best known TNM, Ann Arbor classification or Gleason-score is given. Abbreviations: mm = millimeter; y = year; f = female; m = male; Ø = diameter; AEG = adenocarcinoma of esophagogastric junction; op = operation.
