# Supplementary material for: Cancer, cancer treatment and aneurysmatic ascending aorta growth within a retrospective single center study
Source: Atypon-hosted journal article supplement (doi:10.1024/0301-1526/a001038), 2022-11-14
Supplement: 0301-1526_a001038_esm4.pdf [file 0301-1526_a001038_esm4.pdf]

## Electronic supplementary material

### ESM 4. AscAA growth rates overall and stratified for initial diameter

| initial<br>aortic<br>diameter | annual aneurysm growth rate (mm/y: mean±SD) |         |                                           |        |
|-------------------------------|---------------------------------------------|---------|-------------------------------------------|--------|
|                               | study cohort                                |         | patient cohort with<br>>1mm/y growth rate |        |
| <40mm                         | 1.28±0.74                                   | 3       | 2.13                                      | 1      |
| 40-44mm                       | 0.14±0.60                                   | 51      | 1.45±0.36                                 | 4      |
| 45-49mm                       | 0.17±0.58                                   | 61      | 1.73±0.63                                 | 3      |
| 50-54mm                       | 0.18±0.77                                   | 30      | 1.69±0.11                                 | 4      |
| Overall                       | 0.18±0.64                                   | (n=145) | 1.66±0.39                                 | (n=12) |

The individual growth rates for the cohort presented in the study are given stratified for the initial diameter. Abbreviations: n = number of patients; SD = standard deviation.
