# Supplementary material for: Cancer, cancer treatment and aneurysmatic ascending aorta growth within a retrospective single center study
Source: Atypon-hosted journal article supplement (doi:10.1024/0301-1526/a001038), 2022-11-14
Supplement: 0301-1526_a001038_esm5.pdf [file 0301-1526_a001038_esm5.pdf]

## Electronic supplementary material

### ESM 5. AscAA growth rates stratified by type of chemotherapy YES vs. NO

|                              |     | annual aneurysm growth rate (mm/y) |       |        |      |      |      |      | t-Test        | Wilcoxo | n   |
|------------------------------|-----|------------------------------------|-------|--------|------|------|------|------|---------------|---------|-----|
|                              |     | Min                                | Q1    | Median | Mean | Q3   | Max  | SD   | p             | n p     |     |
| Alkylating agents            | YES | -1.83                              | 0     | 0      | 0.16 | 0.37 | 1.96 | 0.61 | 0.74          | 0.54    | 53  |
|                              | NO  | -1.83                              | 0     | 0.12   | 0.2  | 0.35 | 2.21 | 0.66 |               |         | 92  |
| Anti-metabolites             | YES | -1.57                              | 0     | 0      | 0.23 | 0.37 | 1.96 | 0.72 | 0.71          | 0.71    | 29  |
|                              | NO  | -1.83                              | 0     | 0.06   | 0.17 | 0.35 | 2.21 | 0.63 |               |         | 116 |
| Mitotic inhibitors           | YES | -0.95                              | 0     | 0      | 0.08 | 0.26 | 1.01 | 0.40 | 0.14          | 0.40    | 37  |
|                              | NO  | -1.83                              | 0     | 0      | 0.22 | 0.41 | 2.21 | 0.71 |               |         | 108 |
| Anti-androgens               | YES | -1.10                              | 0     | 0.2    | 0.21 | 0.44 | 1.81 | 0.62 | 0.83          | 0.29    | 35  |
|                              | NO  | -1.81                              | 0     | 0      | 0.18 | 0.34 | 2.21 | 0.65 |               |         | 110 |
| GnRH-Agonists                | YES | -1.83                              | 0     | 0.13   | 0.02 | 0.29 | 1.81 | 0.66 | 0.14          | 0.57    | 30  |
|                              | NO  | -1.83                              | 0     | 0      | 0.23 | 0.4  | 2.21 | 0.64 |               |         | 115 |
| Corticosteroids              | YES | -0.95                              | 0     | 0      | 0.22 | 0.41 | 2.21 | 0.58 | 0.76          | 0.99    | 21  |
|                              | NO  | -1.83                              | 0     | 0      | 0.18 | 0.35 | 2.13 | 0.66 |               |         | 124 |
| Monoclonal antibodies        | YES | -0.22                              | 0     | 0      | 0.19 | 0.24 | 0.90 | 0.35 | 0.98          | 0.67    | 14  |
|                              | NO  | -1.83                              | 0     | 0      | 0.18 | 0.36 | 2.21 | 0.67 |               |         | 131 |
| Topoisomerase inhibitors     | YES | -1.57                              | 0     | 0.11   | 0.28 | 0.50 | 1.96 | 0.92 | 0.73          | 0.61    | 10  |
|                              | NO  | -1.83                              | 0     | 0      | 0.18 | 0.35 | 2.21 | 0.62 |               |         | 135 |
| Antra-cycline                | YES | -0.37                              | 0     | 0      | 0.29 | 0.48 | 1.96 | 0.58 | 0.47          | 0.87    | 15  |
|                              | NO  | -1.83                              | 0     | 0      | 0.17 | 0.35 | 2.21 | 0.65 |               |         | 130 |
| Kinase inhibitors            | YES | 0                                  | 0     | 0.16   | 0.24 | 0.49 | 0.77 | 0.28 | 0.52          | 0.45    | 13  |
|                              | NO  | -1.83                              | 0     | 0      | 0.18 | 0.34 | 2.21 | 0.67 |               |         | 132 |
| VEGF inhibitors              | YES | 0.37                               | 0.40  | 0.43   | 0.43 | 0.46 | 0.49 | 0.09 | <b>0.0498</b> | 0.14    | 2   |
|                              | NO  | -1.82                              | 0     | 0      | 0.18 | 0.35 | 2.21 | 0.65 |               |         | 143 |
| Immune checkpoint inhibitors | YES | 0                                  | 0     | 0.15   | 0.11 | 0.16 | 0.29 | 0.12 | 0.28          | 0.88    | 9   |
|                              | NO  | -1.83                              | 0     | 0      | 0.19 | 0.40 | 2.21 | 0.67 |               |         | 136 |
| PSMA-Ligand                  | YES | -1.09                              | -0.51 | 0.18   | 0.01 | 0.38 | 1.01 | 0.63 | 0.30          | 0.81    | 14  |
|                              | NO  | -1.83                              | 0     | 0      | 0.20 | 0.35 | 2.21 | 0.65 |               |         | 131 |
| IMiDs                        | YES | 0                                  | 0     | 0      | 0.13 | 0.18 | 0.61 | 0.22 | 0.56          | 0.71    | 8   |
|                              | NO  | -1.82                              | 0     | 0      | 0.19 | 0.37 | 2.21 | 0.66 |               |         | 137 |
| Antifolates                  | YES | 0                                  | 0     | 0      | 0    | 0    | 0    | 0    | <b>0.0007</b> | 0.36    | 2   |
|                              | NO  | -1.83                              | 0     | 0      | 0.19 | 0.36 | 2.21 | 0.65 |               |         | 143 |
| Aromatase inhibitors         | YES | 0                                  | 0     | 0      | 0    | 0    | 0    | /    | /             | /       | 1   |
|                              | NO  | -1.82                              | 0     | 0      | 0.19 | 0.36 | 2.21 | 0.65 |               |         | 144 |
| HIFU                         | YES | 0.20                               | 0.20  | 0.20   | 0.20 | 0.20 | 0.20 | /    | /             | /       | 1   |
|                              | NO  | -1.83                              | 0     | 0      | 0.18 | 0.36 | 2.21 | 0.65 |               |         | 144 |

*Notes.* Abbreviations: n = number of patients per group; SD = standard deviation; Q1 = 1. quartile; Q3 = 3. quartile; mm = millimeter; y = year; GnRH = gonadotropin-releasing hormone; VEGF = vascular endothelial growth factor; PSMA = prostate-specific membrane antigen; IMiDs = immunomodulatory imide drugs; HIFU = high intensity focused ultrasound. p-value is based on student t-test; p<0.05 is considered significant and marked bold.
