# Supplementary material for: Cancer, cancer treatment and aneurysmatic ascending aorta growth within a retrospective single center study
Source: Atypon-hosted journal article supplement (doi:10.1024/0301-1526/a001038), 2022-11-14
Supplement: 0301-1526_a001038_esm6.pdf [file 0301-1526_a001038_esm6.pdf]

## Electronic supplementary material

### ESM 6. AscAA growth rates upon linear regression analysis accounting for type of chemotherapy and initial aortic diameter

|                                 | singular therapy |      |
|---------------------------------|------------------|------|
|                                 | est.             | p    |
| <b>alkylating agents</b>        | -0.035           | 0.74 |
| <b>anti-metabolites</b>         | 0.060            | 0.66 |
| <b>mitose inhibitors</b>        | -0.14            | 0.26 |
| <b>monoclonal antibodies</b>    | 0.0042           | 0.98 |
| <b>kinase inhibitors</b>        | 0.067            | 0.73 |
| <b>anti-folates</b>             | -0.18            | 0.69 |
| <b>topoisomerase inhibitors</b> | 0.11             | 0.61 |
| <b>antra - cyclines</b>         | 0.12             | 0.49 |
| <b>VEGF inhibitors</b>          | 0.26             | 0.58 |
| <b>GnRH antagonists</b>         | -0.21            | 0.12 |
| <b>anti-androgens</b>           | 0.026            | 0.84 |
| <b>IMiDs</b>                    | -0.054           | 0.82 |
| <b>cortico steroids</b>         | 0.044            | 0.78 |
| <b>aromatase inhibitors</b>     | -0.18            | 0.78 |

*Notes.* Values are estimate (est.) and p-value of initial diameter corrected linear regression analysis comparing therapy (or combination) yes vs. no. Abbreviations: GnRH = gonadotropin-releasing hormone; VEGF = vascular endothelial growth factor; IMiDs = immunomodulatory imide drugs.
