# Supplementary material for: Cancer, cancer treatment and aneurysmatic ascending aorta growth within a retrospective single center study
Source: Atypon-hosted journal article supplement (doi:10.1024/0301-1526/a001038), 2022-11-14
Supplement: 0301-1526_a001038_esm7.pdf [file 0301-1526_a001038_esm7.pdf]

# Electronic supplementary material

## ESM 7. AscAA growth rates stratified by type of malignancy YES vs. NO

|                          |     | annual aneurysm growth rate (mm/y) |       |        |       |      |      |      | t-Test         | Wilcoxon | n   |
|--------------------------|-----|------------------------------------|-------|--------|-------|------|------|------|----------------|----------|-----|
|                          |     | Min                                | Q1    | Median | Mean  | Q3   | Max  | SD   | p              | p        |     |
| prostate                 | YES | -1.83                              | 0.00  | 0.14   | 0.25  | 0.42 | 3.25 | 0.76 | 0.92           | 0.41     | 55  |
|                          | NO  | -1.83                              | 0.00  | 0.00   | 0.23  | 0.36 | 4.48 | 0.78 |                |          | 90  |
| hematologic/<br>lymphoma | YES | -0.76                              | 0.00  | 0.00   | 0.11  | 0.29 | 0.70 | 0.32 | 0.35           | 0.41     | 20  |
|                          | NO  | -1.83                              | 0.00  | 0.00   | 0.20  | 0.36 | 2.21 | 0.68 |                |          | 125 |
| colorectal               | YES | -1.83                              | 0.00  | 0.06   | 0.09  | 0.15 | 1.56 | 0.77 | 0.67           | 0.53     | 11  |
|                          | NO  | -1.83                              | 0.00  | 0.00   | 0.25  | 0.42 | 4.48 | 0.77 |                |          | 134 |
| head and<br>neck         | YES | -0.39                              | 0.00  | 0.00   | 0.26  | 0.24 | 1.68 | 0.59 | 0.69           | 0.82     | 10  |
|                          | NO  | -1.83                              | 0.00  | 0.00   | 0.23  | 0.41 | 4.48 | 0.78 |                |          | 135 |
| stomach                  | YES | -1.06                              | 0.00  | 0.06   | 0.20  | 0.41 | 1.67 | 0.67 | 0.97           | 0.88     | 9   |
|                          | NO  | -1.83                              | 0.00  | 0.00   | 0.24  | 0.40 | 4.48 | 0.78 |                |          | 136 |
| lung                     | YES | 0.00                               | 0.00  | 0.00   | 0.27  | 0.27 | 1.82 | 0.60 | 0.67           | 0.81     | 9   |
|                          | NO  | -1.83                              | 0.00  | 0.06   | 0.23  | 0.42 | 4.48 | 0.78 |                |          | 136 |
| melanoma                 | YES | -0.24                              | 0.00  | 0.15   | 0.16  | 0.27 | 0.83 | 0.30 | 0.83           | 0.96     | 9   |
|                          | NO  | -1.83                              | 0.00  | 0.00   | 0.24  | 0.42 | 4.48 | 0.79 |                |          | 136 |
| pancreas                 | YES | -1.63                              | -1.12 | 0.15   | -0.11 | 0.38 | 2.13 | 1.25 | 0.50           | 0.66     | 8   |
|                          | NO  | -1.83                              | 0.00  | 0.00   | 0.26  | 0.41 | 4.48 | 0.73 |                |          | 137 |
| esophagus                | YES | 0.00                               | 0.00  | 0.22   | 0.53  | 0.45 | 1.96 | 0.82 | 0.39           | 0.38     | 5   |
|                          | NO  | -1.83                              | 0.00  | 0.00   | 0.23  | 0.39 | 4.48 | 0.77 |                |          | 140 |
| kidney                   | YES | 0.24                               | 0.30  | 0.36   | 0.54  | 0.69 | 1.02 | 0.42 | 0.21           | 0.33     | 2   |
|                          | NO  | -1.83                              | 0.00  | 0.00   | 0.23  | 0.40 | 4.48 | 0.77 |                |          | 143 |
| mamma                    | YES | 0.00                               | 0.09  | 0.18   | 0.32  | 0.48 | 0.77 | 0.40 | 0.62           | 0.54     | 3   |
|                          | NO  | -1.83                              | 0.00  | 0.00   | 0.23  | 0.40 | 4.48 | 0.77 |                |          | 142 |
| sarcoma                  | YES | -0.37                              | -0.18 | 0.00   | -0.06 | 0.09 | 0.18 | 0.28 | 0.26           | 0.30     | 3   |
|                          | NO  | -1.83                              | 0.00  | 0.00   | 0.24  | 0.42 | 4.48 | 0.77 |                |          | 142 |
| thyroid                  | YES | 0.00                               | 0.00  | 0.00   | 0.00  | 0.00 | 0.00 | 0.00 | <b>0.00074</b> | 0.37     | 2   |
|                          | NO  | -1.83                              | 0.00  | 0.00   | 0.24  | 0.41 | 4.48 | 0.77 |                |          | 143 |
| urinary tract            | YES | 0.00                               | 0.00  | 0.00   | 0.00  | 0.00 | 0.00 | 0.00 | <b>0.00074</b> | 0.37     | 2   |
|                          | NO  | -1.83                              | 0.00  | 0.00   | 0.24  | 0.41 | 4.48 | 0.77 |                |          | 143 |
| ovarian                  | YES | 0.37                               | 0.42  | 0.47   | 0.47  | 0.52 | 0.57 | 0.14 | 0.15           | 0.13     | 2   |
|                          | NO  | -1.83                              | 0.00  | 0.00   | 0.23  | 0.40 | 4.48 | 0.77 |                |          | 143 |

Notes. Cancer types with only singular occurrence are not shown.  $p < 0.05$  is considered significant and marked bold. Abbreviations: n = number of patients per group; SD = standard deviation; Q1 = 1. quartile; Q3 = 3. quartile; mm = millimeter; y = year.
