# Supplementary material for: Cancer, cancer treatment and aneurysmatic ascending aorta growth within a retrospective single center study
Source: Atypon-hosted journal article supplement (doi:10.1024/0301-1526/a001038), 2022-11-14
Supplement: 0301-1526_a001038_esm8.pdf [file 0301-1526_a001038_esm8.pdf]

## Electronic supplementary material

### ESM 8. Frequency of chemotherapeutic agents in relation to the total number of chemotherapies

| <b>chemotherapeutic agents</b> | <b>n=310</b> | <b>(%)</b> |
|--------------------------------|--------------|------------|
| alkylating agents              | 56           | 18.1       |
| mitotic inhibitors             | 39           | 12.6       |
| antiandrogens                  | 36           | 11.6       |
| antimetabolites                | 31           | 10.0       |
| GnRH agonists                  | 31           | 10.0       |
| corticosteroids                | 24           | 7.7        |
| monoclonal antibodies          | 17           | 5.5        |
| anthracycline                  | 16           | 5.2        |
| PSMA ligands                   | 14           | 4.5        |
| kinase/proteasome inhibitors   | 13           | 4.2        |
| topoisomerase inhibitors       | 10           | 3.2        |
| immunecheckpoint inhibitors    | 9            | 2.9        |
| IMiDs                          | 8            | 2.6        |
| antifolates                    | 2            | 0.6        |
| VEGF inhibitors                | 2            | 0.6        |
| aromatase inhibitors           | 1            | 0.3        |
| HIFU                           | 1            | 0.3        |

*Notes.* Percentage is given in relation to the total number of 310 chemotherapies applied. A single patient received on average more than two chemotherapies. Abbreviations: n = number of chemotherapies; GnRH = gonadotropin-releasing hormone; VEGF = vascular endothelial growth factor; PSMA = prostate-specific membrane antigen; IMiDs = immunomodulatory imide drugs; HIFU = high intensity focused ultrasound.
